# Supplementary material for: A large meta-analysis identifies genes associated with anterior uveitis
Source: PubMed Central journal article supplement (PMC10638276; doi:10.1038/s41467-023-43036-1), 2023-11-11
Supplement: 41467_2023_43036_MOESM3_ESM.pdf [file 41467_2023_43036_MOESM3_ESM.pdf]

## Description of Additional Supplementary Files

File Name: Supplementary Data 1

Description: Single-variants that are included in the *IPMK* PLoF and damaging missense (5/5) AF<0.1% gene burden mask.

File Name: Supplementary Data 2

Description: Annotated list of variants in AU cases that are included in the top gene burden results.

File Name: Supplementary Data 3

Description: Single-variants that are included in the *IDO2* PLoF AF<0.1% gene burden mask.

File Name: Supplementary Data 4

Description: *ERAPI* haplotype associations with B27-positive AU.

File Name: Supplementary Data 5

Description: The combined risk for AU with *HLA-B27* and *ERAPI*-haplotypes.

File Name: Supplementary Data 6

Description: HLA Class-II allele associations for B27-negative cohort.

File Name: Supplementary Data 7

Description: HLA Class-II allele associations for B27-negative cohort, adjusted for top *HLA-DPB1* SNP.

File Name: Supplementary Data 8

Description: Rare gene burden masks significantly associated with B27-negative AU.

File Name: Supplementary Data 9

Description: Cohort breakdown and *HLA-B27* carrier counts.
